# Supplementary material for: Imaging EGFR and HER3 through 89Zr-labeled MEHD7945A (Duligotuzumab)
Source: PubMed Central journal article supplement (PMC5998059; doi:10.1038/s41598-018-27454-6), 2018-06-13
Supplement: 41598_2018_27454_MOESM1_ESM.pdf [file 41598_2018_27454_MOESM1_ESM.pdf]

## **Imaging EGFR and HER3 through <sup>89</sup>Zr-labeled MEHD7945A (Duligotuzumab)**

Brooke N. McKnight<sup>1</sup>, Akhila N. W. Kuda-Wedagedara<sup>1</sup>, Kuntal K. Sevak<sup>2</sup>, Dalya Abdel-Atti<sup>2</sup>, Wendy N. Wiesend<sup>3</sup>, Anson Ku<sup>2</sup>, Dakshnamurthy Selvakumar<sup>1</sup>, Sean D. Carlin<sup>2</sup>, Jason S. Lewis<sup>2,4,5</sup>, Nerissa T. Viola-Villegas<sup>1,2\*</sup>

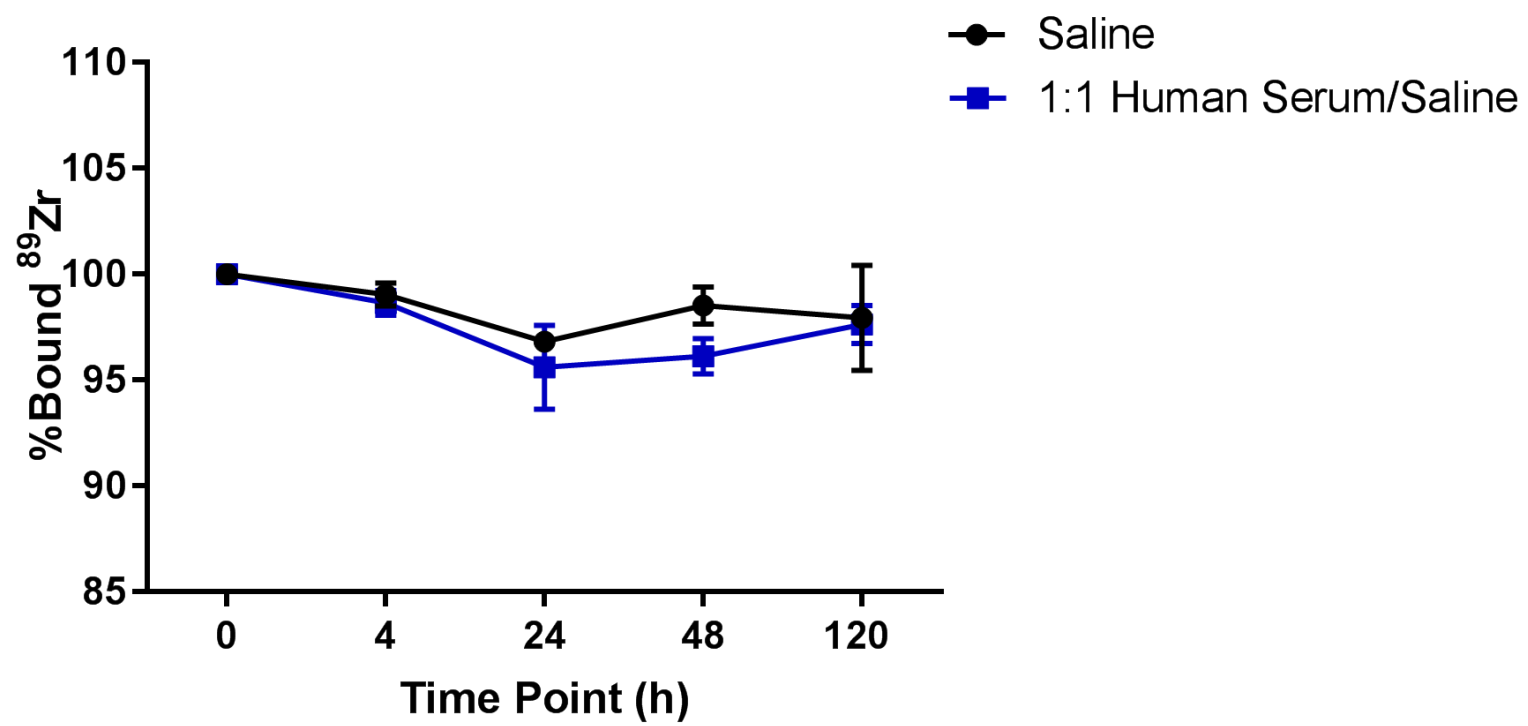

| Time point (h) | Saline<br>(Mean %Bound ± S.D.) | 1:1 Human Serum:Saline<br>(Mean %Bound ± S.D.) |
|----------------|--------------------------------|------------------------------------------------|
| 4              | 99.05 ± 0.54                   | 98.65 ± 0.60                                   |
| 24             | 96.82 ± 0.41                   | 95.62 ± 1.99                                   |
| 48             | 98.52 ± 0.89                   | 96.14 ± 0.83                                   |
| 72             | 95.39 ± 1.02                   | 96.92 ± 2.80                                   |
| 120            | 97.95 ± 2.48                   | 97.64 ± 0.90                                   |

**Supplementary Figure S1. Stability of  $^{89}\text{Zr}$ -MEHD7945A in serum and saline up to 120 h.**  $^{89}\text{Zr}$ -MEHD7945A was incubated in saline or 1:1 human serum:saline for up to 120 h and demetalation of  $^{89}\text{Zr}$  was measured via iTLC.

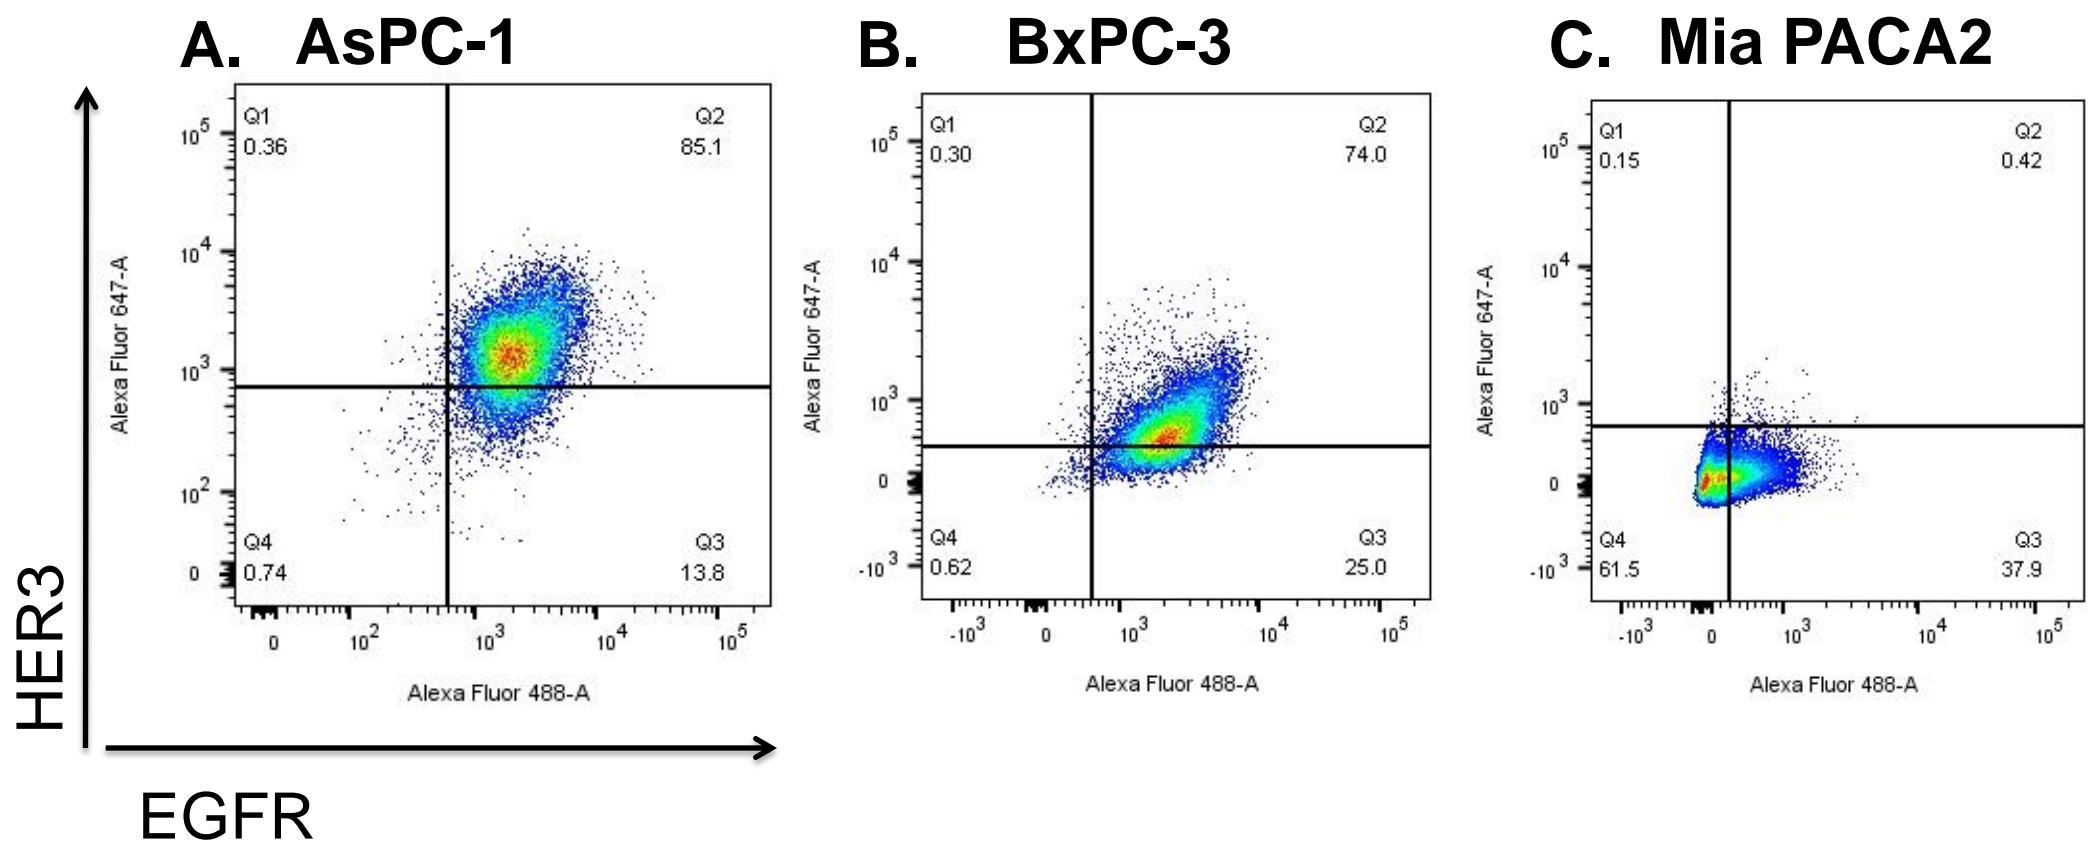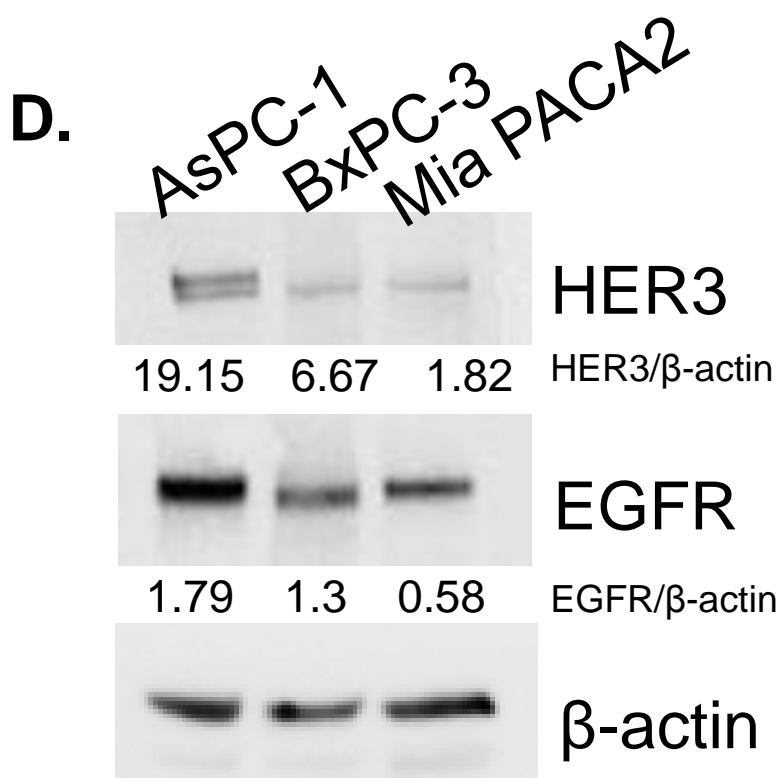

**Supplementary Figure S2. EGFR and HER3 expression on cell lines.** Flow cytometry demonstrates expression of EGFR and HER3 in AsPC-1 (A), BxPC-3 (B), and Mia PACA2 (C). Western blot analysis exhibits total HER3 and EGFR protein on AsPC-1, BxPC-3, and Mia PACA2 cell lysates (D) Densitometry is displayed as a ratio of target protein to loading control  $\beta$ -actin.

## A. AsPC-1

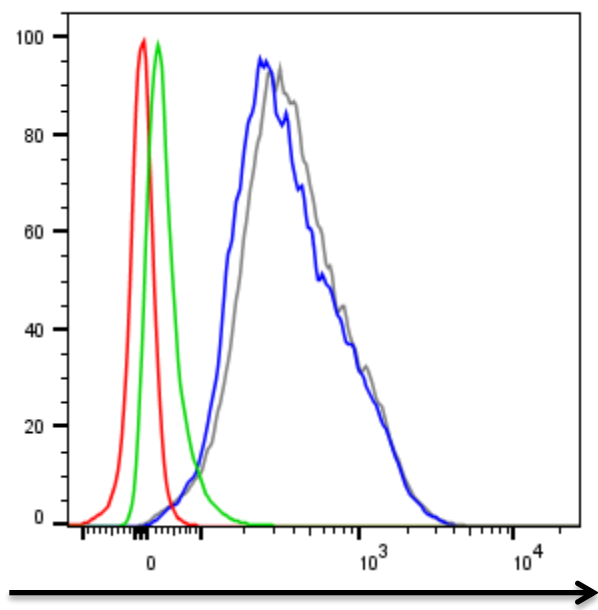

EGFR

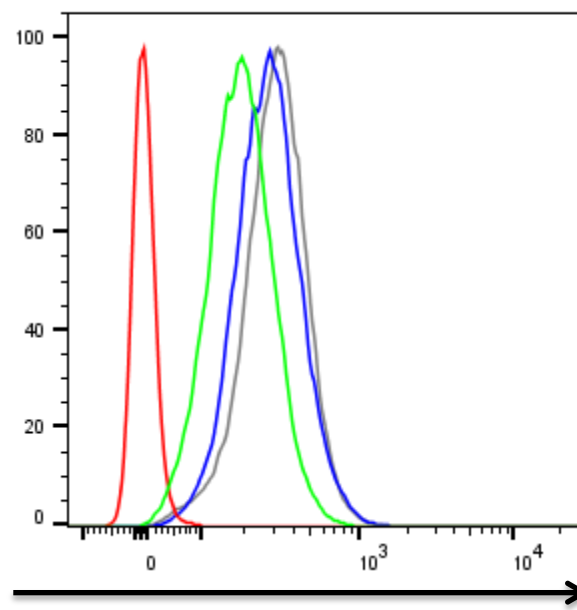

HER3

Control  
25× MEHD7945A  
25× Cetuximab  
25× DL3.6b

## B. BxPC-3

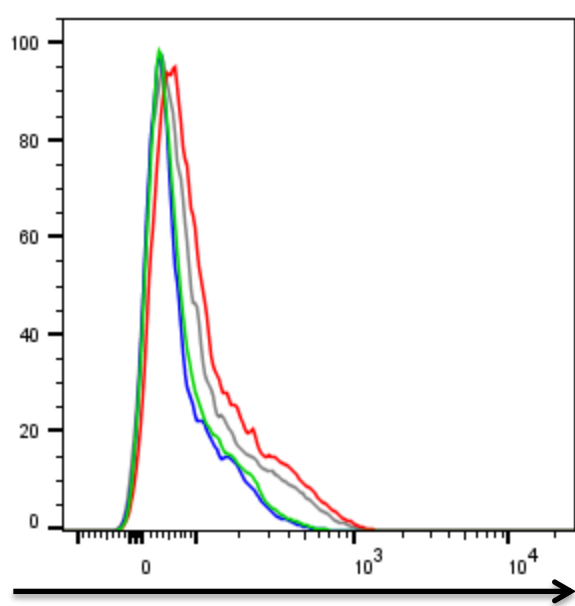

EGFR

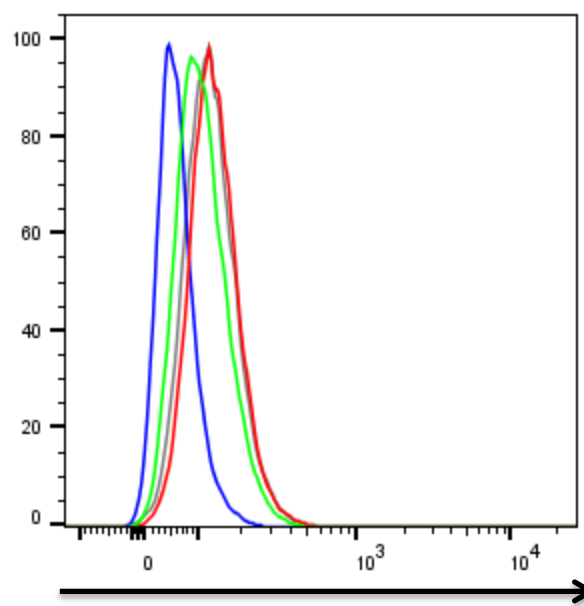

HER3

**Supplementary Figure S3. Flow cytometry analysis of EGFR and HER3 receptor expression after blocking.** AsPC-1 (A) and BxPC-3 (B) cells incubated with 25-fold cold doses of MEHD7945A (green), Cetuximab (red) and DL3.6b (blue) showed a decrease in cell populations possessing both EGFR (left) and HER3 (right) expression compared to unblocked cells (gray). Expression on the x-axis is expressed as median fluorescent intensity (MFI).

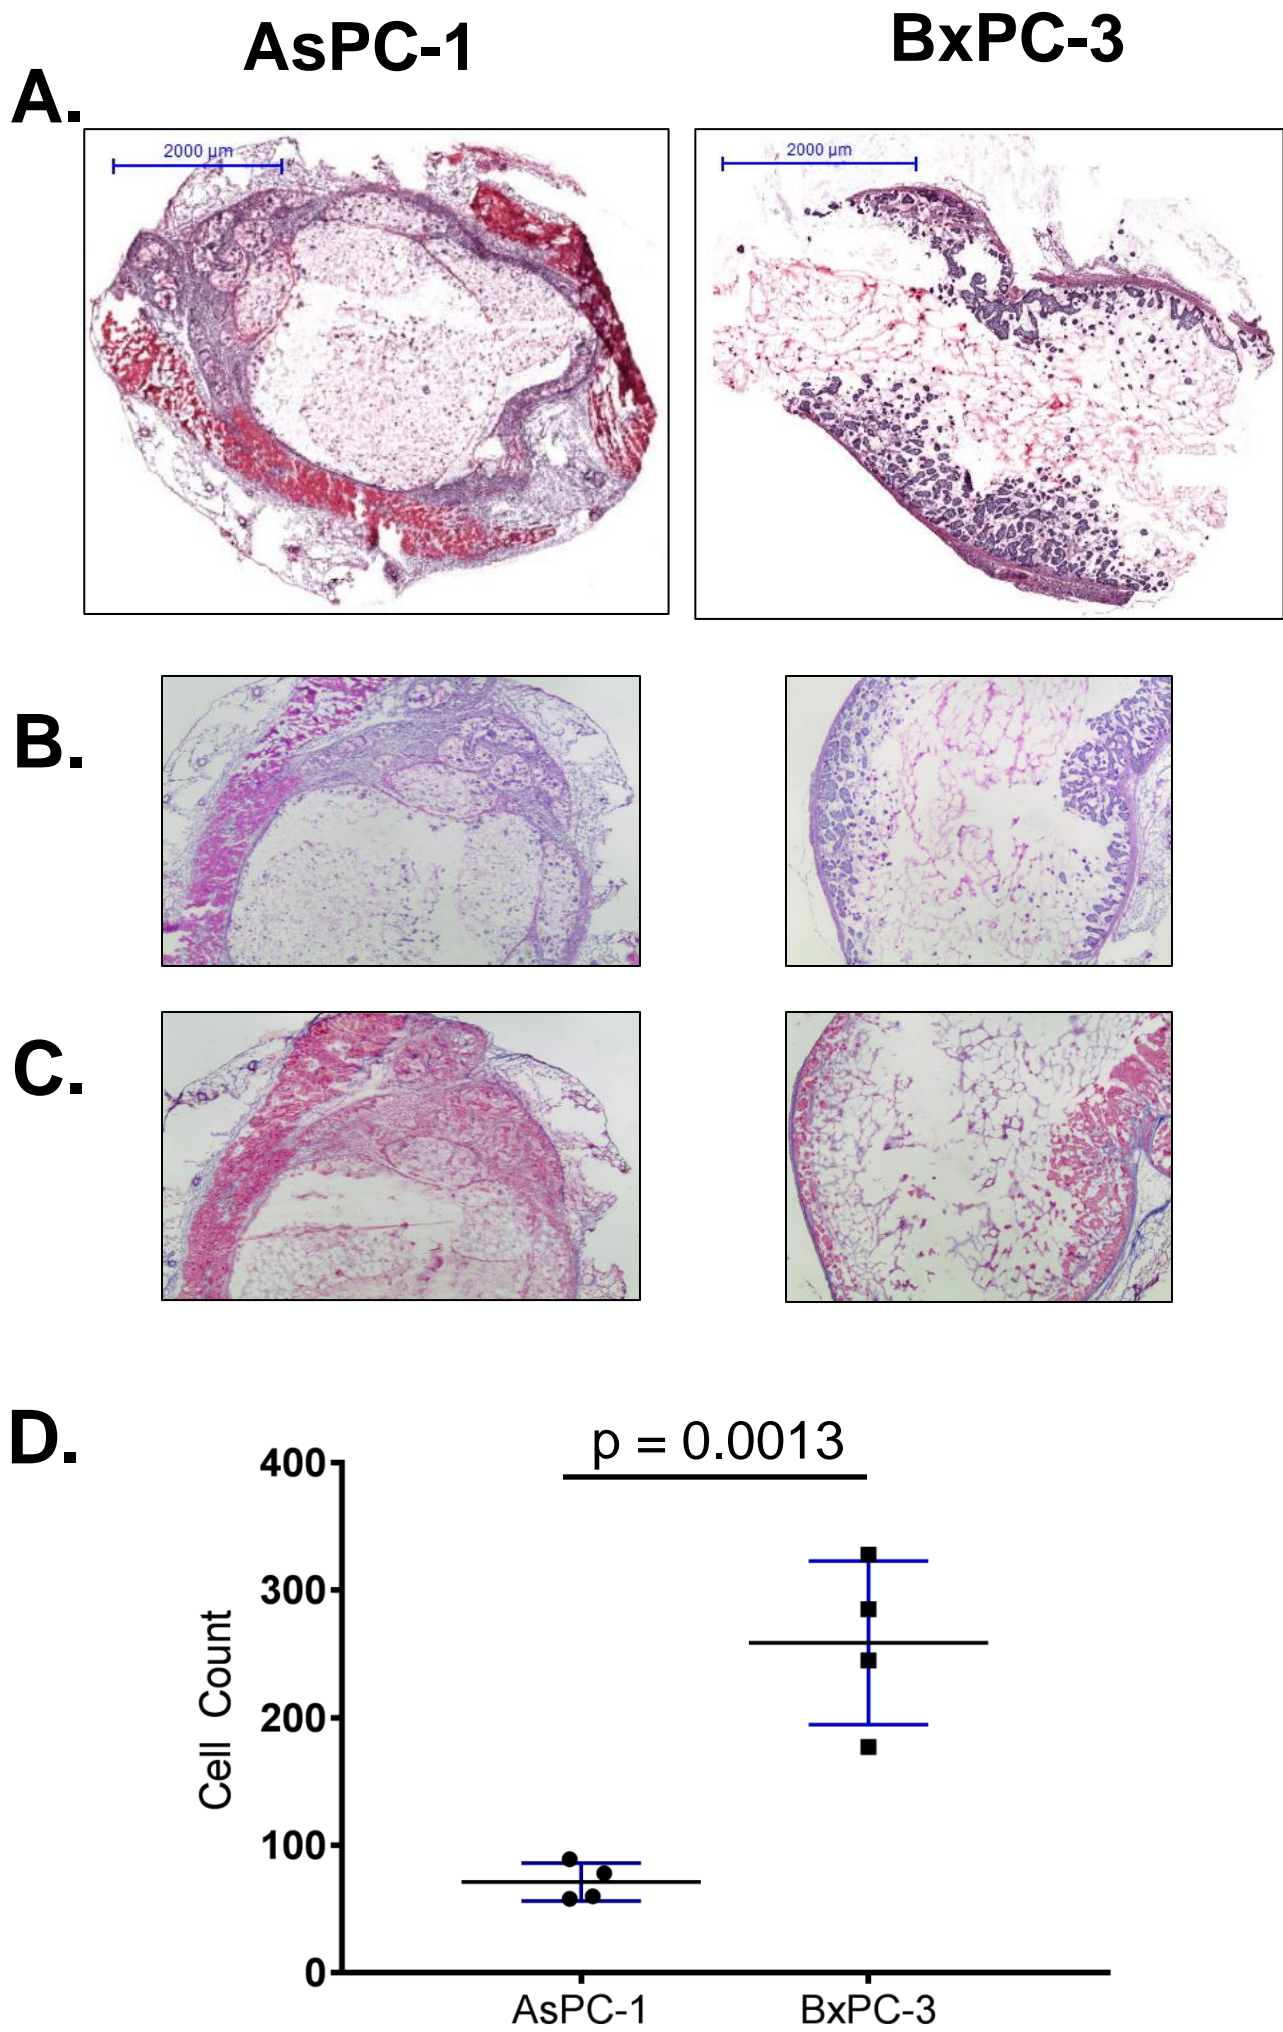

**Supplementary Figure S4. Immunohistochemistry.** AsPC-1 (left) and BxPC-3 (right) tumors showed viability based on full sized H&E (**A**), 20× magnified H&E (**B**), and 20× trichrome stain (**C**). Higher cell density was observed in BxPC-3 vs. AsPC-1 ( $258 \pm 64$  vs.  $71 \pm 15$ ,  $p = 0.0013$ ) (**D**).

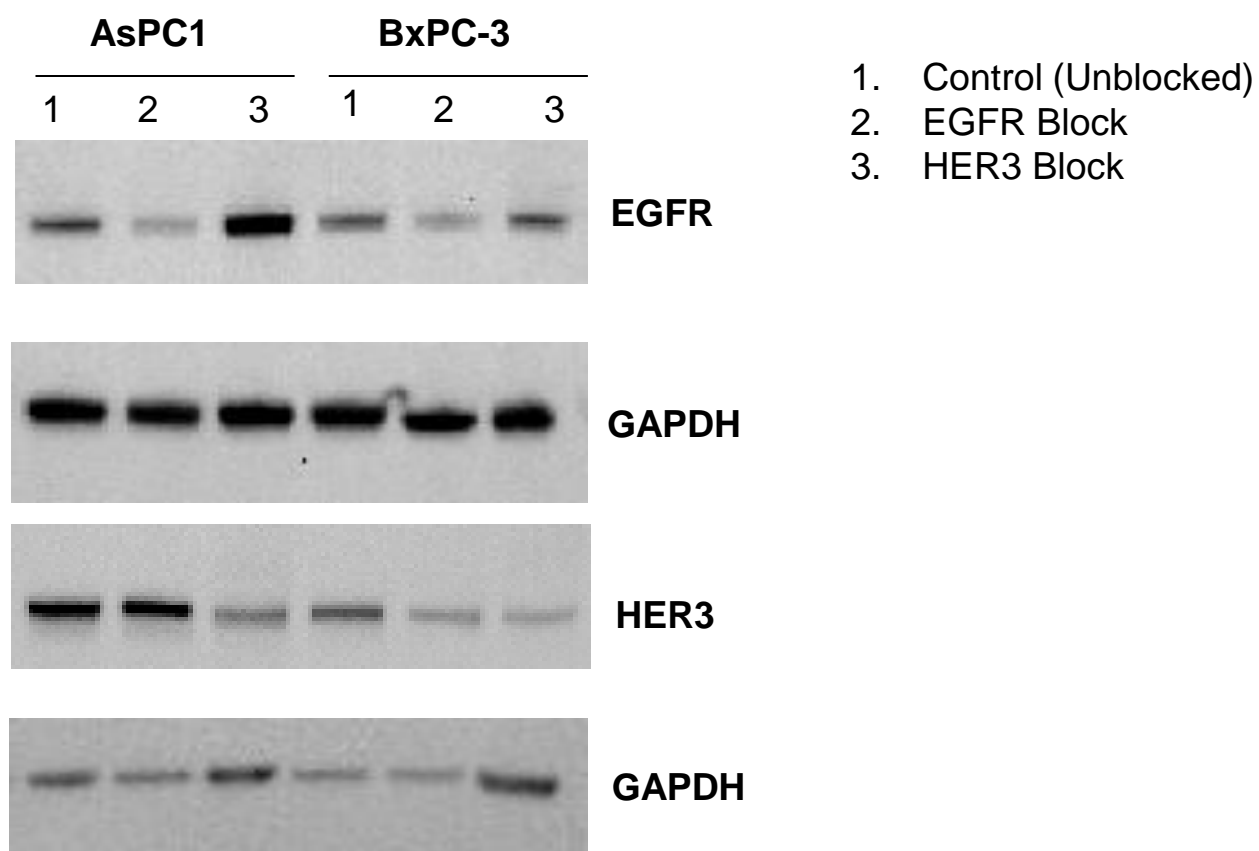

**Supplementary Figure S5.** Western blots of AsPC-1 (left) and BxPC-3 (right) tumors demonstrating EGFR and HER3 total protein in control untreated (lane 1), cetuximab-blocked (lane 2) and HER3-blocked (lane 3) cohorts of mice

**Supplementary Table S1. In vitro competitive binding with MEHD7945A, cetuximab and DL3.6b exhibited different uptake of <sup>89</sup>Zr-MEHD7945A in AsPC-1 and BxPC-3 cells. Flow cytometry data expressed as mean fluorescent intensities (MFI) in both cell lines exposed to 25× MEHD7945A, cetuximab and DL3.6b display varied EGFR and HER3 expression.**

|                               | AsPC-1                                                            |        |                              |        |                              |        | BxPC-3                                                         |        |                              |        |                              |        |
|-------------------------------|-------------------------------------------------------------------|--------|------------------------------|--------|------------------------------|--------|----------------------------------------------------------------|--------|------------------------------|--------|------------------------------|--------|
|                               | <sup>89</sup> Zr-<br>MEHD794<br>5A<br>Binding<br>(Mean ±<br>S.D.) | P      | EGFR<br>(Mean MFI ±<br>S.D.) | P      | HER3<br>(Mean MFI<br>± S.D.) | P      | <sup>89</sup> Zr-<br>MEHD7945<br>A Binding<br>(Mean ±<br>S.D.) | P      | EGFR<br>(Mean MFI ±<br>S.D.) | P      | HER3<br>(Mean MFI<br>± S.D.) | P      |
| <b>Control<br/>(No Block)</b> | 5.55 ± 0.64                                                       |        | 340.3 ± 32.8                 |        | 79.6 ± 11.5                  |        | 11.72 ± 3.54                                                   |        | 307.7 ± 11.2                 |        | 127.0 ± 3.6                  |        |
| <b>25x MEHD7945A</b>          | 1.06 ± 0.82                                                       | 0.0001 | 32.6 ± 2.8                   | 0.0001 | 57.3 ± 3.7                   | 0.0962 | 0.29 ± 0.16                                                    | 0.0001 | 182.7 ± 28.4                 | 0.0001 | 95.4 ± 7.7                   | 0.0123 |
| <b>10x MEHD7945A</b>          | 1.97 ± 0.74                                                       | 0.0001 |                              |        |                              |        | 1.02 ± 0.34                                                    | 0.0001 |                              |        |                              |        |
| <b>25x Cetuximab</b>          | 1.47 ± 0.42                                                       | 0.0001 | 0.10 ± 0.9                   | 0.0001 | 80.4 ± 6.9                   | 0.9996 | 1.02 ± 0.23                                                    | 0.0001 | 3.3 ± 0.8                    | 0.0001 | 130.3 ± 4.0                  | 0.9774 |
| <b>10x Cetuximab</b>          | 1.09 ± 0.47                                                       | 0.0001 |                              |        |                              |        | 1.21 ± 0.46                                                    | 0.0001 |                              |        |                              |        |
| <b>25x DL3.6b</b>             | 5.60 ± 0.51                                                       | n.s.   | 336.0 ± 3.6                  | 0.0001 | 48.2 ± 4.9                   | 0.0128 | 16.36 ± 0.88                                                   | 0.0001 | 284.0 ± 13.1                 | 0.0739 | 63.3 ± 8.2                   | 0.0001 |
| <b>10x DL3.6b</b>             | 3.47 ± 0.26                                                       | 0.0194 | .                            |        |                              |        | 6.98 ± 0.69                                                    | 0.0001 |                              |        |                              |        |

**Supplementary Table S2. Tissue uptake (Mean %ID/g  $\pm$  S.D.) of <sup>89</sup>Zr-MEHD7945A in BxPC-3 tumor xenografts.**

| <b>Tissue</b>   | <b>24 h</b> |            | <b>48 h</b> |            | <b>96 h</b> |            | <b>120 h</b> |            | <b>48 h Block</b> |            |
|-----------------|-------------|------------|-------------|------------|-------------|------------|--------------|------------|-------------------|------------|
| <b>Blood</b>    | 10.49       | $\pm$ 0.89 | 8.37        | $\pm$ 0.60 | 5.32        | $\pm$ 1.04 | 2.99         | $\pm$ 0.54 | 10.24             | $\pm$ 0.44 |
| <b>Tumor</b>    | 18.97       | $\pm$ 9.13 | 31.08       | $\pm$ 3.89 | 32.85       | $\pm$ 4.70 | 32.73        | $\pm$ 5.31 | 12.97             | $\pm$ 3.44 |
| <b>Heart</b>    | 3.96        | $\pm$ 0.98 | 2.92        | $\pm$ 0.59 | 2.13        | $\pm$ 0.81 | 1.23         | $\pm$ 0.32 | 4.13              | $\pm$ 0.37 |
| <b>Lungs</b>    | 4.97        | $\pm$ 2.00 | 4.49        | $\pm$ 2.85 | 5.88        | $\pm$ 1.64 | 2.85         | $\pm$ 1.31 | 7.77              | $\pm$ 1.84 |
| <b>Liver</b>    | 8.69        | $\pm$ 3.96 | 9.75        | $\pm$ 1.98 | 5.79        | $\pm$ 2.26 | 7.62         | $\pm$ 0.68 | 2.99              | $\pm$ 1.72 |
| <b>Spleen</b>   | 4.34        | $\pm$ 0.30 | 3.72        | $\pm$ 1.77 | 4.26        | $\pm$ 1.39 | 2.68         | $\pm$ 1.42 | 1.49              | $\pm$ 0.60 |
| <b>Stomach</b>  | 1.73        | $\pm$ 0.81 | 1.30        | $\pm$ 0.69 | 1.17        | $\pm$ 0.42 | 1.18         | $\pm$ 0.27 | 0.96              | $\pm$ 0.60 |
| <b>Gut</b>      | 0.99        | $\pm$ 0.23 | 1.17        | $\pm$ 0.31 | 0.78        | $\pm$ 0.32 | 0.73         | $\pm$ 0.16 | 0.70              | $\pm$ 0.07 |
| <b>Pancreas</b> | 1.71        | $\pm$ 1.95 | 1.06        | $\pm$ 0.39 | 1.38        | $\pm$ 0.61 | 0.96         | $\pm$ 0.20 | 0.97              | $\pm$ 0.75 |
| <b>Kidneys</b>  | 2.26        | $\pm$ 1.52 | 2.39        | $\pm$ 0.41 | 2.95        | $\pm$ 1.12 | 2.31         | $\pm$ 0.55 | 2.90              | $\pm$ 1.08 |
| <b>Bone</b>     | 5.05        | $\pm$ 1.82 | 6.84        | $\pm$ 3.85 | 8.09        | $\pm$ 3.85 | 8.86         | $\pm$ 4.34 | 4.03              | $\pm$ 1.60 |
| <b>Muscle</b>   | 0.32        | $\pm$ 0.07 | 0.38        | $\pm$ 0.19 | 0.46        | $\pm$ 0.29 | 0.30         | $\pm$ 0.18 | 0.64              | $\pm$ 0.52 |



**Supplementary Table S3. Tumor uptake (Mean %ID/g  $\pm$  S.D.) of  $^{89}\text{Zr}$ -MEHD7945A in AsPC-1 and BxPC-3 tumor xenografts blocked with Cetuximab or DL3.6b.**

| <b>Tumor</b>  | <b>Control</b>    | <b>DL3.6b Block</b> |             | <b>Cetuximab Block</b> |             |
|---------------|-------------------|---------------------|-------------|------------------------|-------------|
| <b>AsPC-1</b> | 19.30 $\pm$ 5.59  | 18.79               | $\pm$ 8.75  | 7.72                   | $\pm$ 6.70  |
| <b>BxPC-3</b> | 28.56 $\pm$ 10.81 | 46.89               | $\pm$ 20.44 | 21.79                  | $\pm$ 14.19 |
